# Supplementary material for: Electrospun CuAl2O4 hollow nanofibers as visible light photocatalyst with enhanced activity and excellent stability under acid and alkali conditions
Source: Royal Society of Chemistry journal article supplement (doi:10.1039/c7ce01545c), 2017-11-23
Supplement: c7ce01545c1.pdf [file c7ce01545c1.pdf]

## **Electronic Supplementary Information**

### **Electrospun $\text{CuAl}_2\text{O}_4$ hollow nanofibers as visible light photocatalyst with enhanced activity and excellent stability under acid and alkali conditions**

Jian Zhang, Changlu Shao,\* Xinghua Li,\* Jiayu Xin, Shu Yang, Yichun Liu <sup>a</sup>

<sup>a</sup> *Center for Advanced Optoelectronic Functional Materials Research, Key Laboratory of UV-Emitting Materials and Technology (Northeast Normal University), Ministry of Education, 5268 Renmin Street, Changchun 130024, People's Republic of China*

#### **Corresponding Authors**

\*Email: clshao@nenu.edu.cn; Tel. 8643185098803.

\*Email: lixh781@nenu.edu.cn; Tel. 8643185098803.

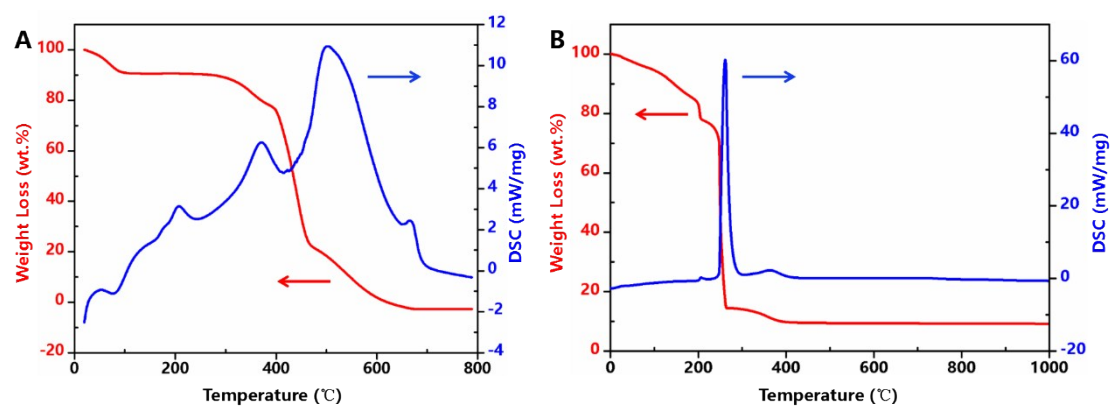

**Fig. S1** TG-DSC curves of thermal decomposition of pure PVP NFs (A) and PVP/Cu(NO<sub>3</sub>)<sub>2</sub>/Al(NO<sub>3</sub>)<sub>3</sub> composite NFs (B) at the heating rate of 10 °C/min in air.

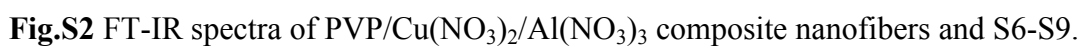

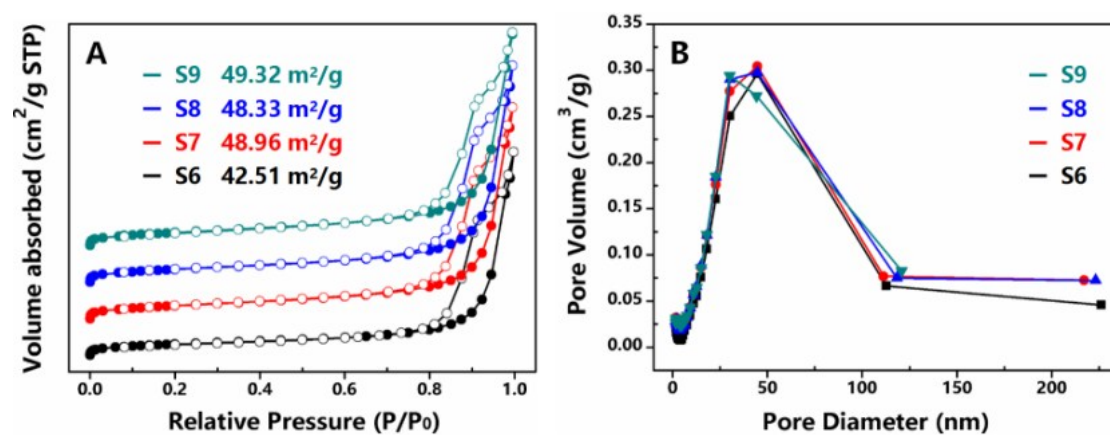

**Fig. S3** Nitrogen adsorption-desorption isotherms (A) and pore size distribution (B) of S6 - S9.

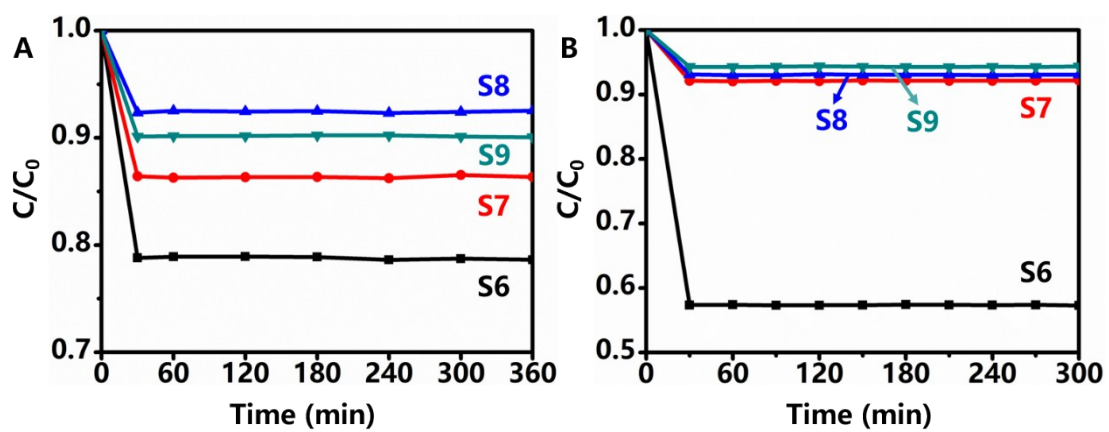

**Fig. S4** Absorption of RhB and MO solution with the samples in the dark.

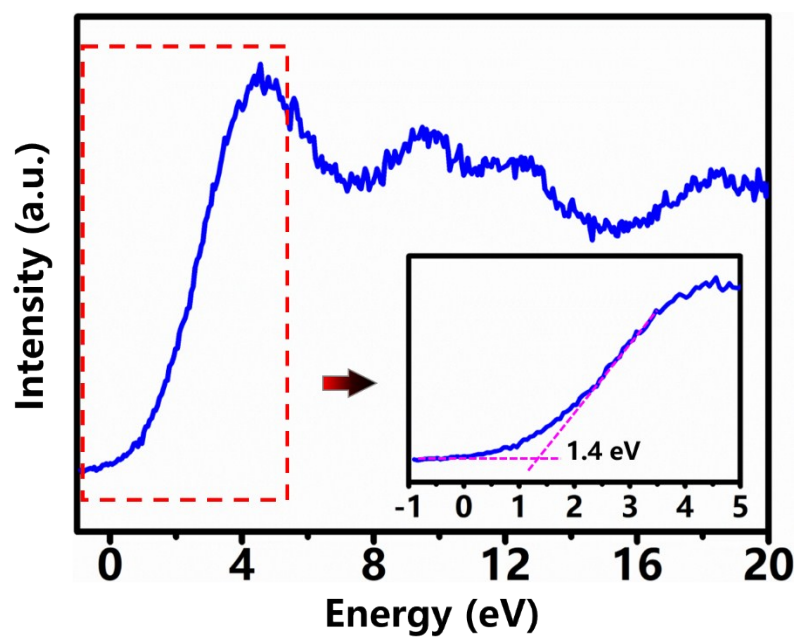

**Fig. S5** XPS valence band spectrum of as-prepared  $\text{CuAl}_2\text{O}_4$  HNFs (S8). The insert is the enlarged spectrum from the region noted by dotted box

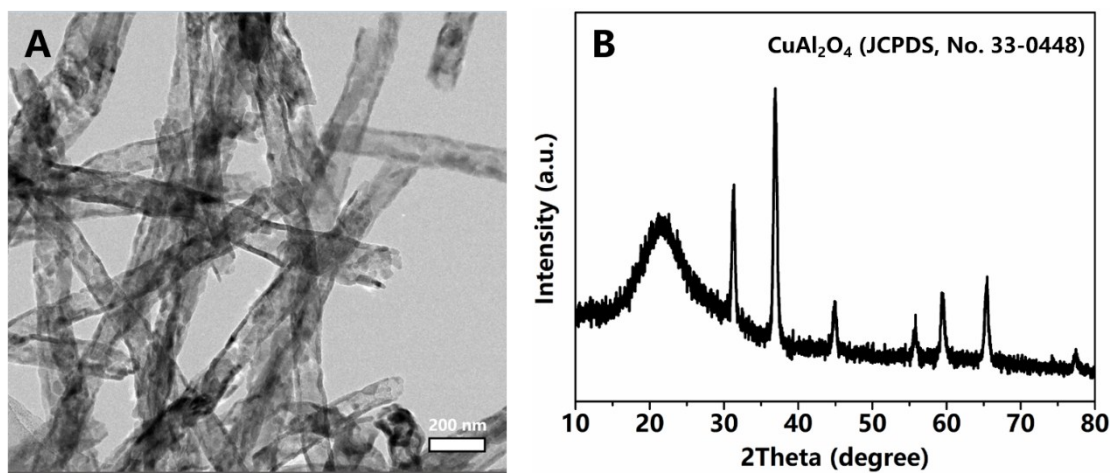

**Fig. S6** TEM image (A) and XRD pattern (B) of S8 after photodegradation of MO.
